# Supplementary material for: Head-to-tail interactions of the coiled-coil domains regulate ClpB activity and cooperation with Hsp70 in protein disaggregation
Source: eLife journal article supplement (doi:10.7554/elife.02481), 2014-04-30

Repressed E432A

Hyperactive Y503D

Starting model

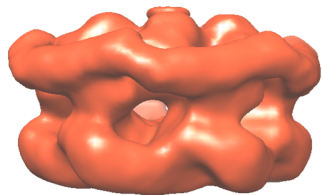

Starting model

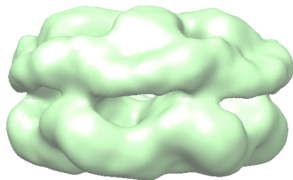

Hyperactive dataset

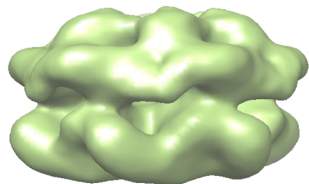

Repressed dataset

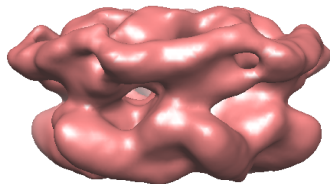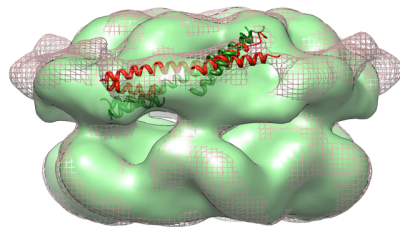

Supplement: supp [file elife-02481-supp-v1.zip]
