# Supplementary figures and images for: Head-to-tail interactions of the coiled-coil domains regulate ClpB activity and cooperation with Hsp70 in protein disaggregation
Source: eLife journal article supplement (doi:10.7554/elife.02481), 2014-04-30

**A**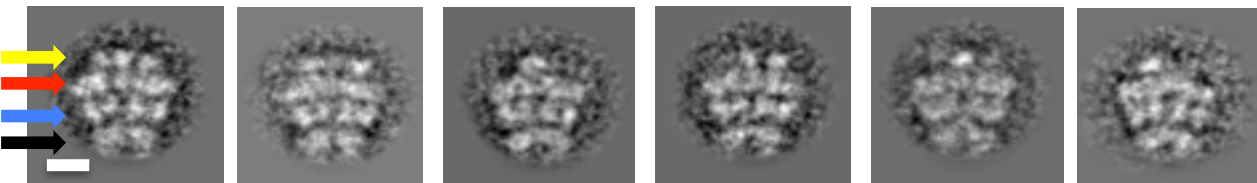**B**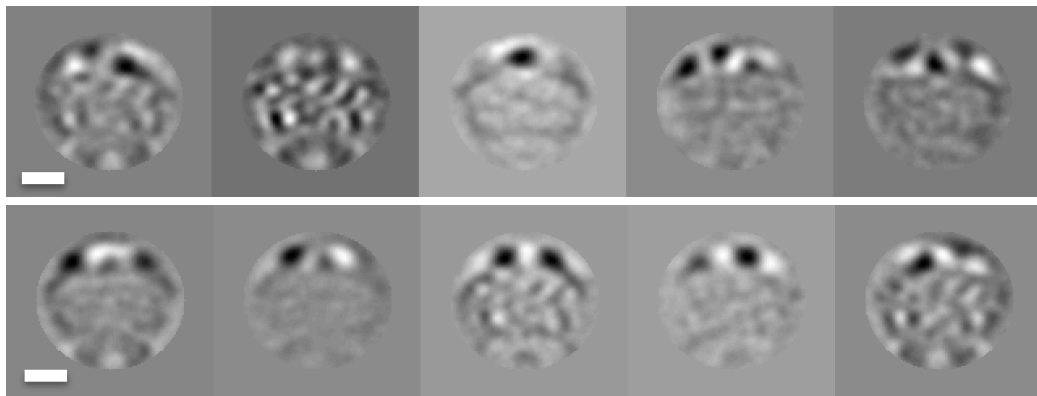

Supplement: supp [file elife-02481-supp-v1.zip]

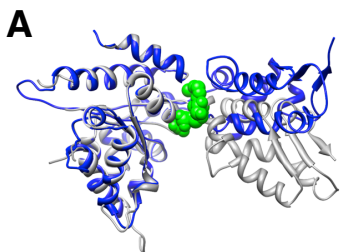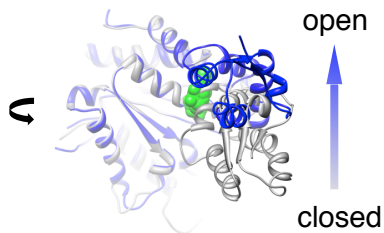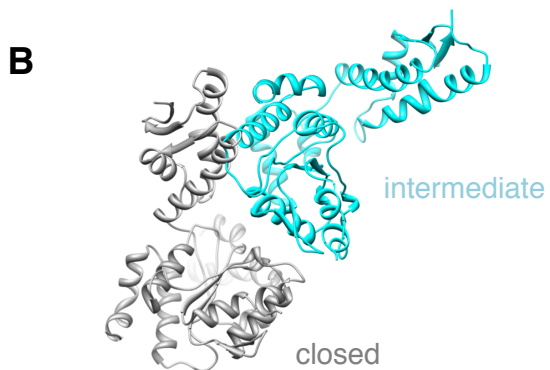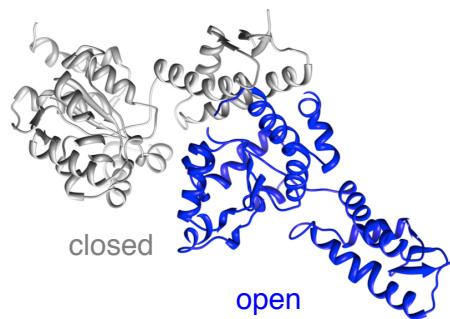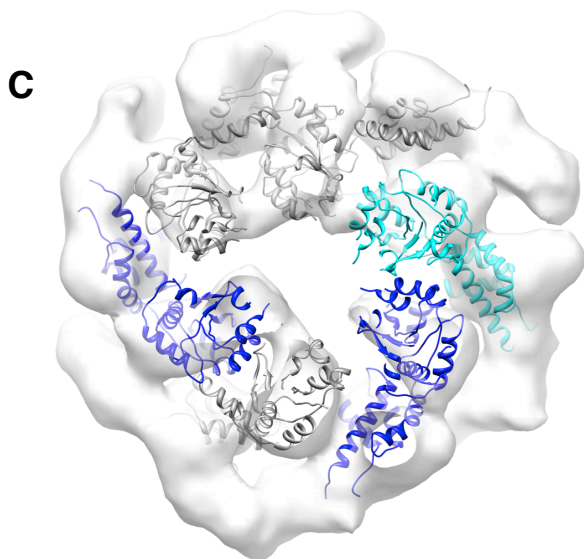

AAA-1

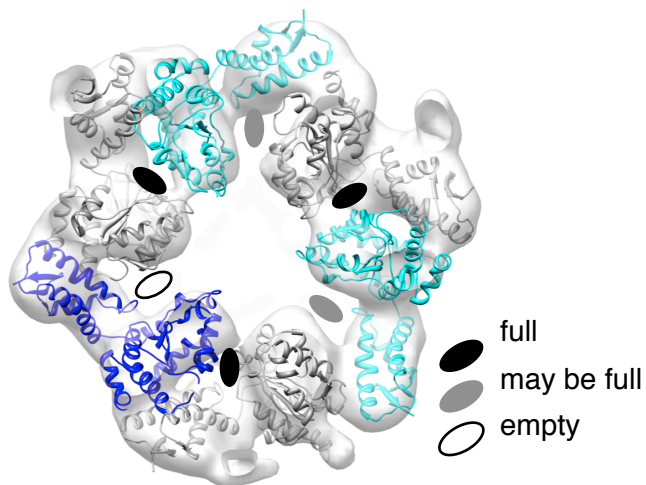

AAA-2

Supplement: supp [file elife-02481-supp-v1.zip]

## Wild-type BAP-ClpP C1

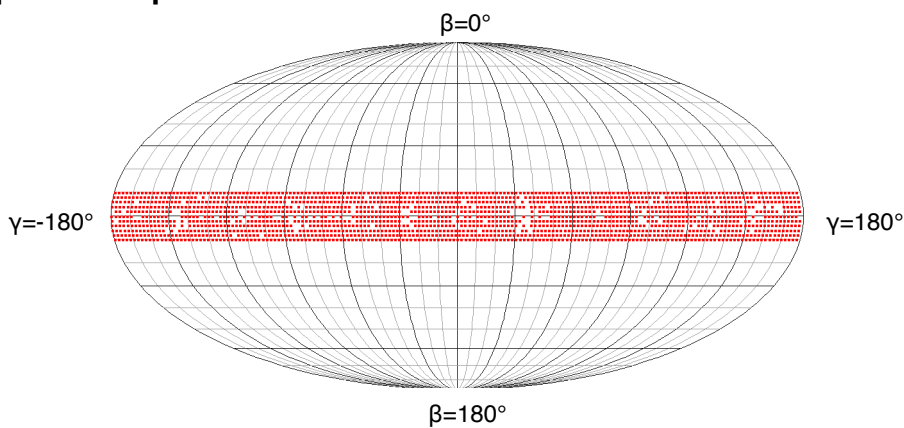

## Repressed BAPE432A -ClpP C1

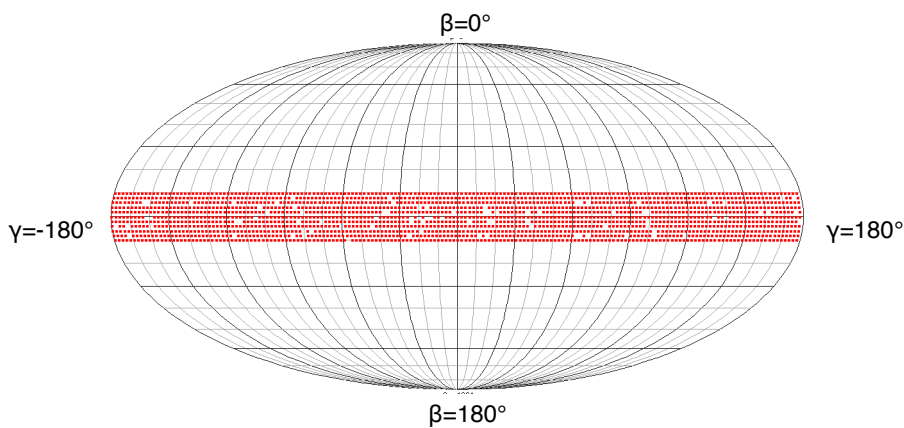

## Hyperactive BAPY503D -ClpP C1

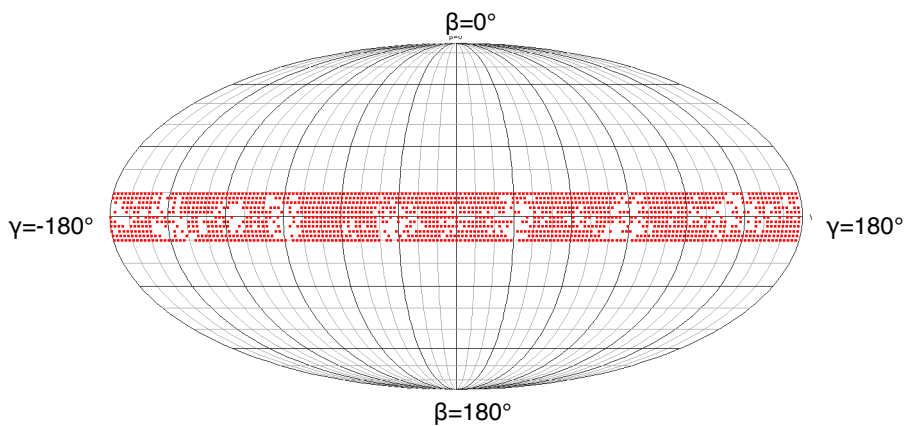

Supplement: supp [file elife-02481-supp-v1.zip]

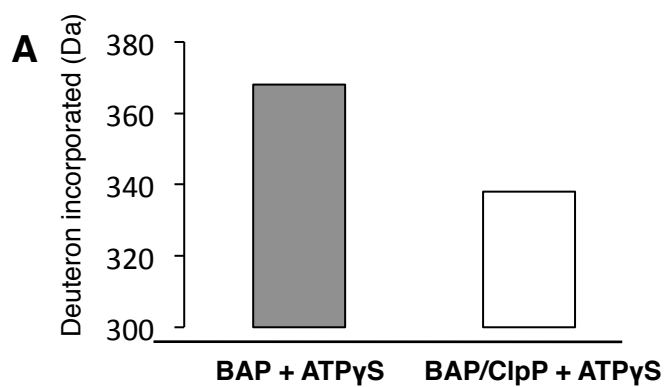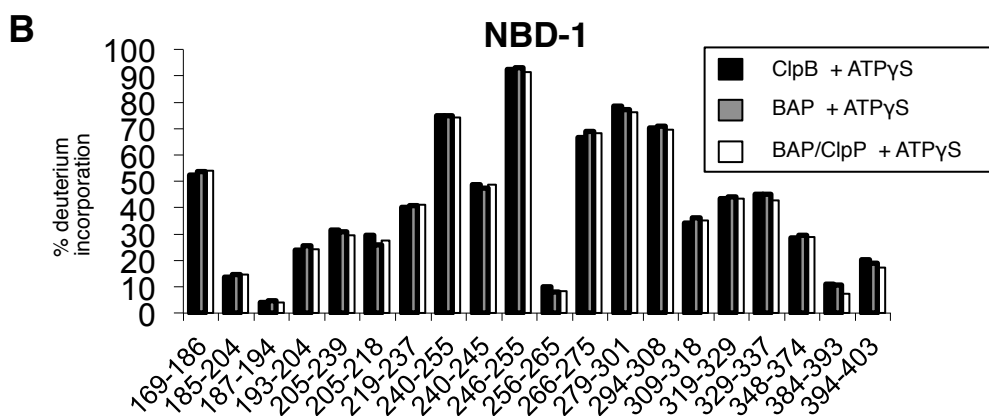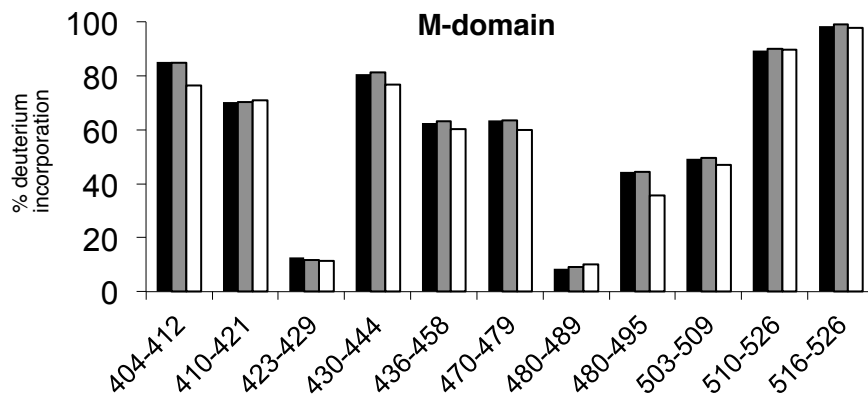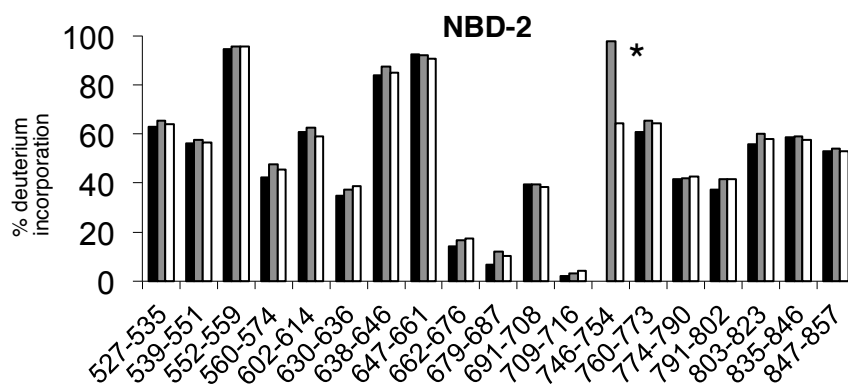

Supplement: supp [file elife-02481-supp-v1.zip]

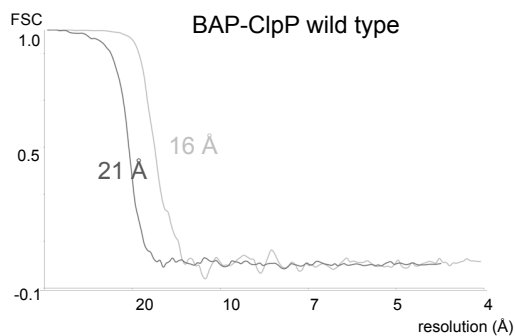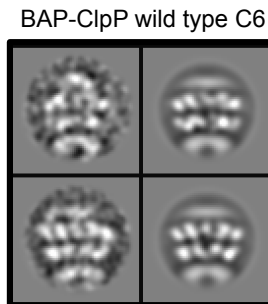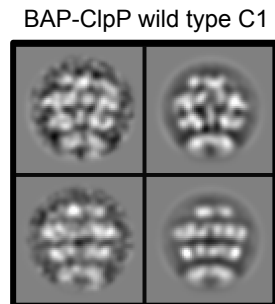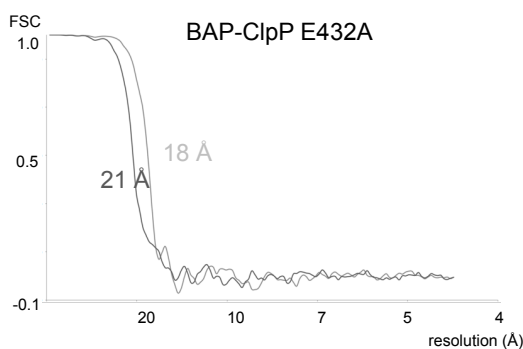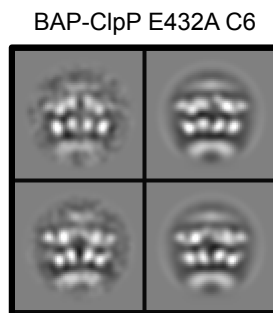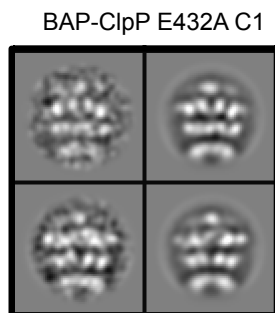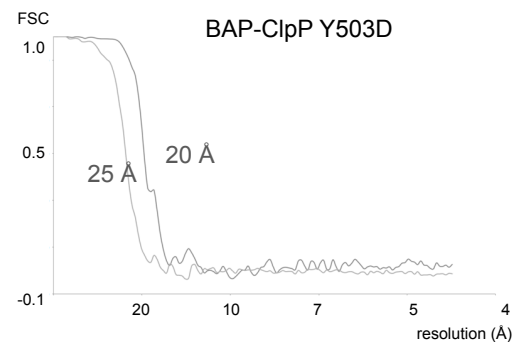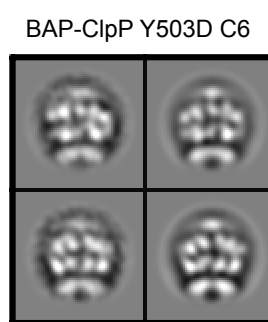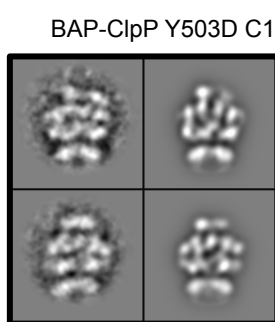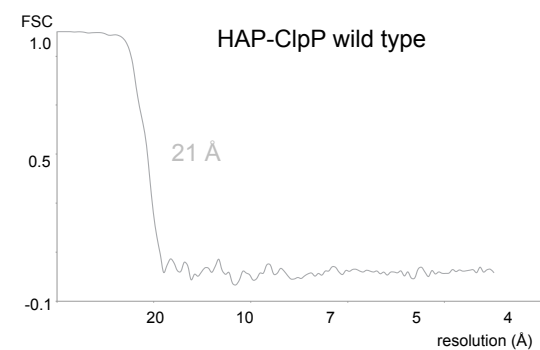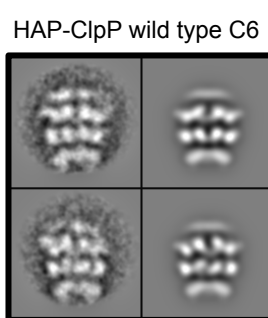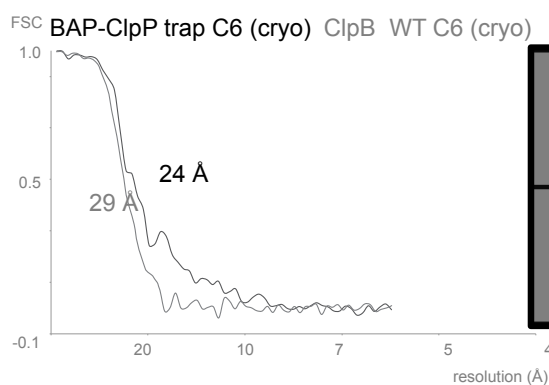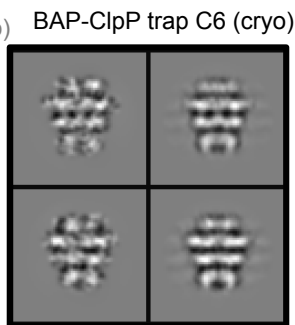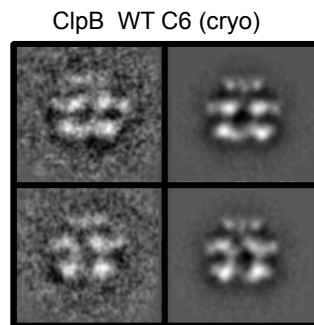

Supplement: supp [file elife-02481-supp-v1.zip]

**A**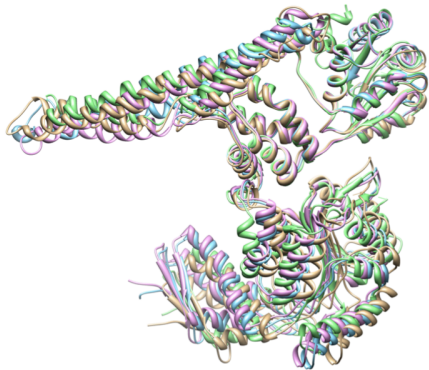**B**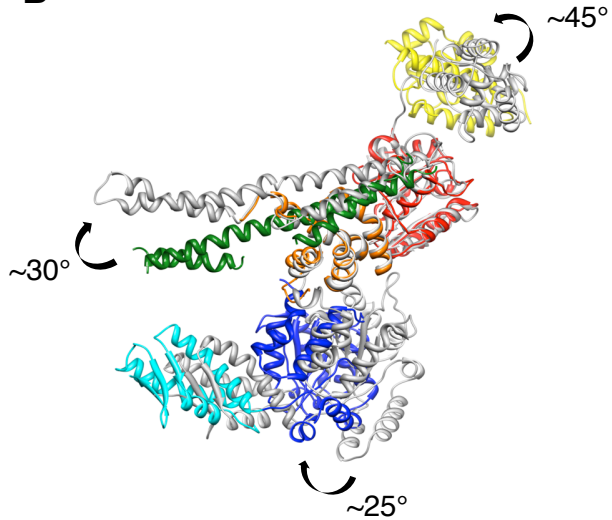

Supplement: supp [file elife-02481-supp-v1.zip]

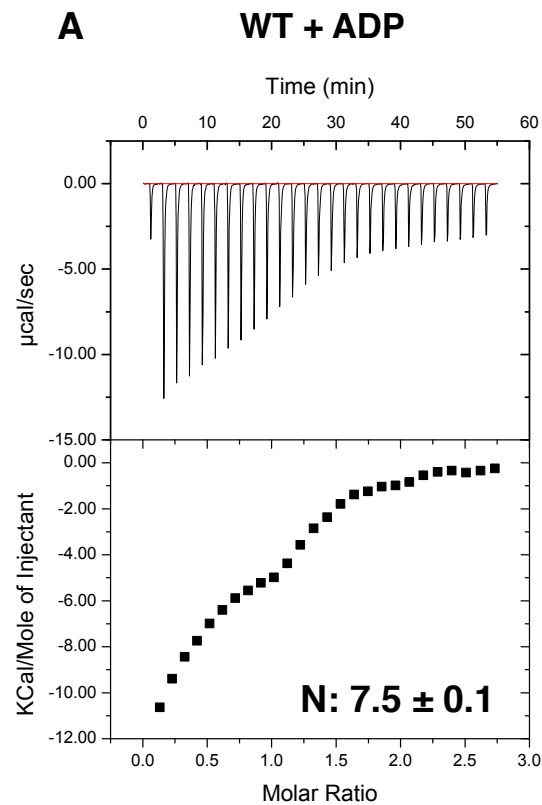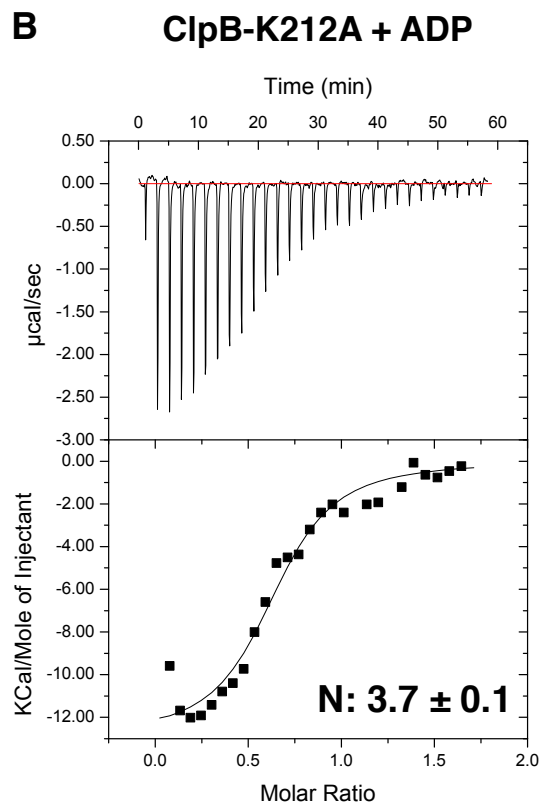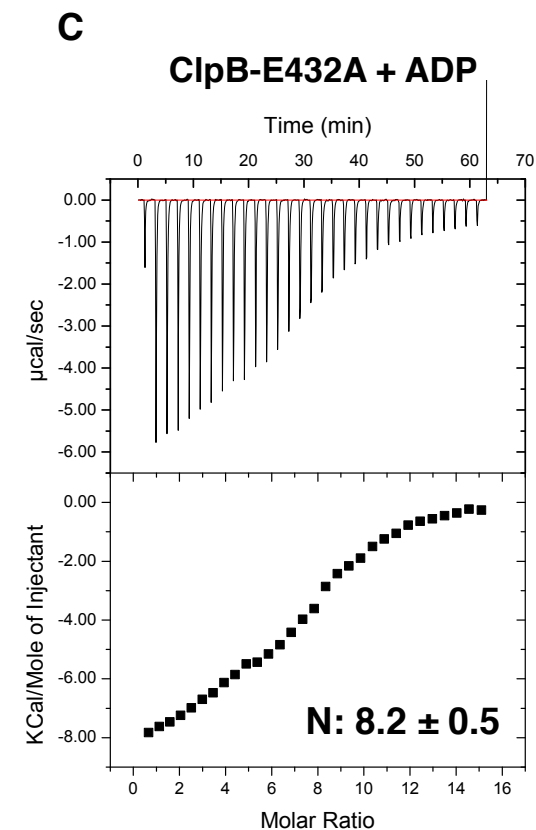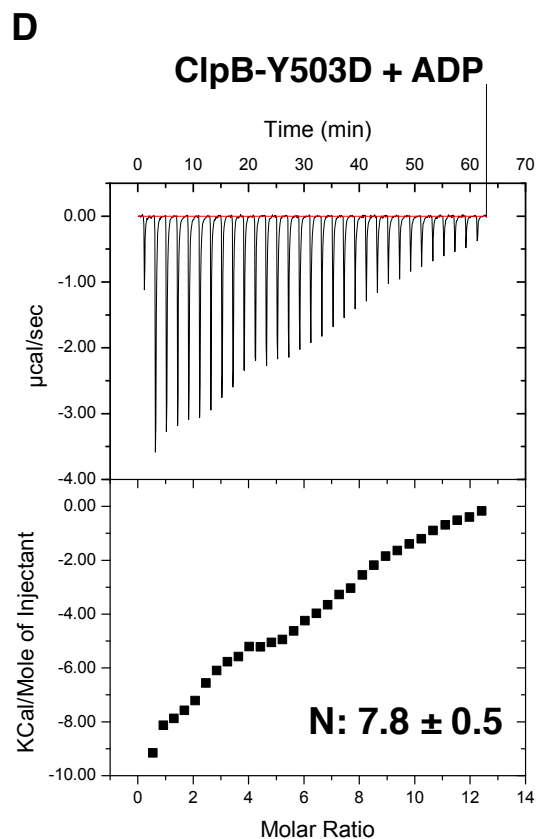

Supplement: supp [file elife-02481-supp-v1.zip]

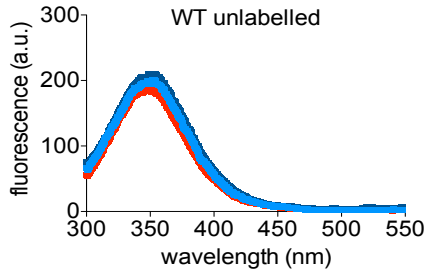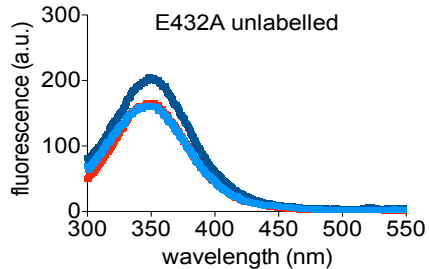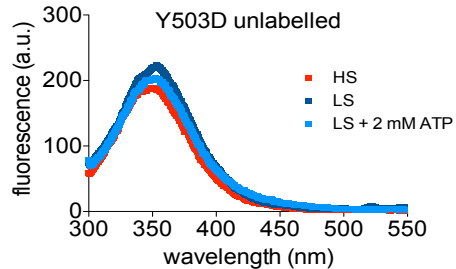

Supplement: supp [file elife-02481-supp-v1.zip]

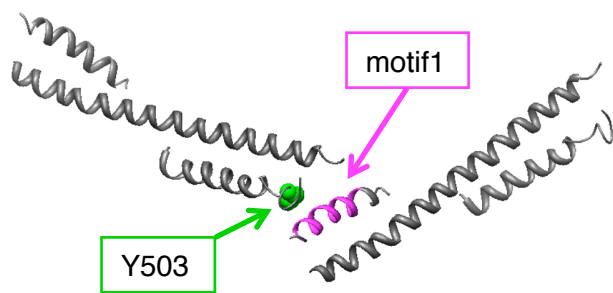

E432A fit

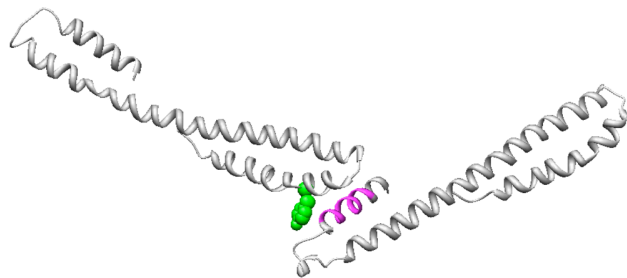

*T. thermophilus* crystal  
(chain AB)

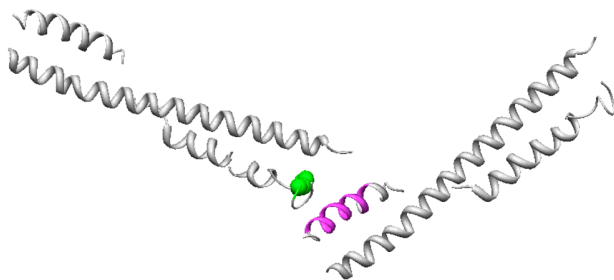

*E. coli* crystal

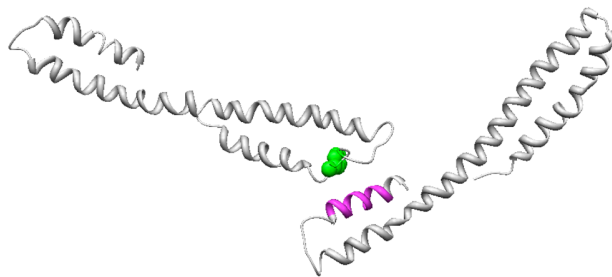

*T. Thermophilus*  
crystal (chain BC)

Supplement: supp [file elife-02481-supp-v1.zip]
